# Supplementary material
Source: ML conference proceedings conference paper supplement (https://openreview.net/forum?id=fO2VDz41ET)
Supplement: supplementary_material [file attachment]

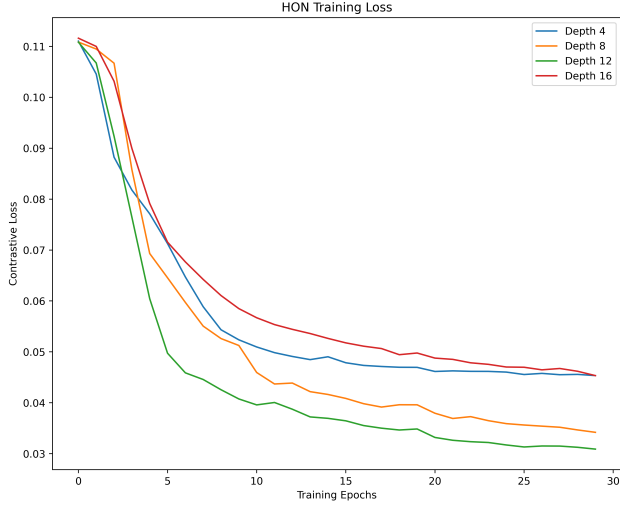

(a) HON training loss curves.

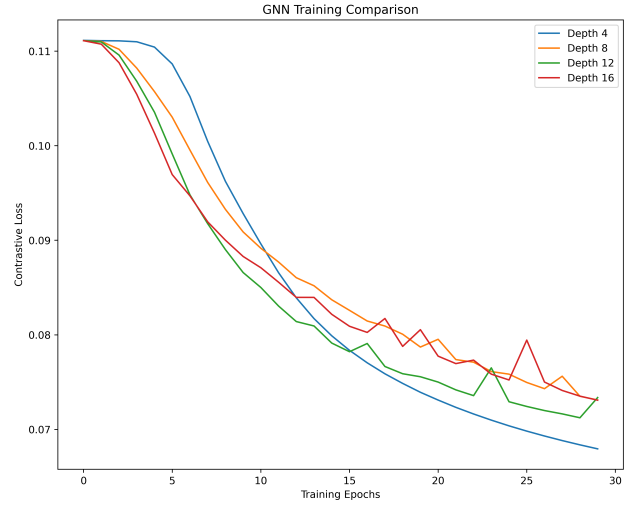

(b) GNN training loss curves.

Figure 4. Training loss curves show the avg. training loss for each training epoch.

## A. Message-passing and GNNs

At a high level, message-passing is an iterative algorithm that updates node features by exchanging messages between neighboring nodes. More formally, let  $G$  be a graph with vertex set  $V$  and edge set  $E$ . Each node  $i \in V$  is assigned a feature vector  $h_i$ . The neighborhood of  $i$ , denoted  $N(i)$ , is the set of nodes that are connected to  $i$  with an edge.

For a node  $j \in N(i)$ , the message  $i$  receives from  $j$  is defined as:

$$m_{ij} = \Phi_e(h_i, h_j, w_{ij})$$

In this definition,  $\Phi_e$  is some function which takes both feature vectors and edge weight  $w_{ij}$ . The received messages are then aggregated to a single vector  $m_i$ :

$$m_i = \sum_{j \in N(i)} m_{ij}$$

$h_i$  is then updated using a function  $\Phi_h(h_i, m_i)$ .

GNNs use the message-passing framework but they learn the functions  $\Phi_e, \Phi_h$  by parameterizing them as multi-layer perceptrons (MLPs). GNNs are multi-layered models where each layer performs an iteration of message-passing. The depth of a GNN is the number of layers it has. The update equations for layer  $t$  are formally defined as:

$$\begin{aligned} m_{ij}^t &= \Phi_e^t(h_i^t, h_j^t, w_{ij}) \\ m_i^t &= \sum_{j \in N(i)} m_{ij}^t \\ h_i^{t+1} &= \Phi_h^t(h_i^t, m_i^t) \end{aligned}$$

## B. Experiments: Model Depth Sweep

Both models saw very little variation in performance from depth. As seen in Figure 4, the depth 4 GNN and depth 12 HON had the lowest training losses. The HON achieves significantly lower training loss and sees much faster and more stable convergence than the GNN.

The test performance shown in Figure 5 shows that despite higher training loss, depth 16 was the highest performing depth for the GNN. The HON once again significantly outperforms the GNN baseline achieving 80 – 90% correct colorings compared to the GNNs 50 – 60% and with quicker, more stable convergence. We chose the depth 16 GNN and depth 12 HON for the full dataset performance comparison.

330  
331  
332  
333  
334  
335  
336  
337  
338  
339  
340  
341  
342  
343  
344  
345  
346  
347  
348  
349  
350  
351  
352  
353  
354  
355  
356  
357  
358  
359  
360  
361  
362  
363  
364  
365  
366  
367  
368  
369  
370  
371  
372  
373  
374  
375  
376  
377  
378  
379  
380  
381  
382  
383  
384

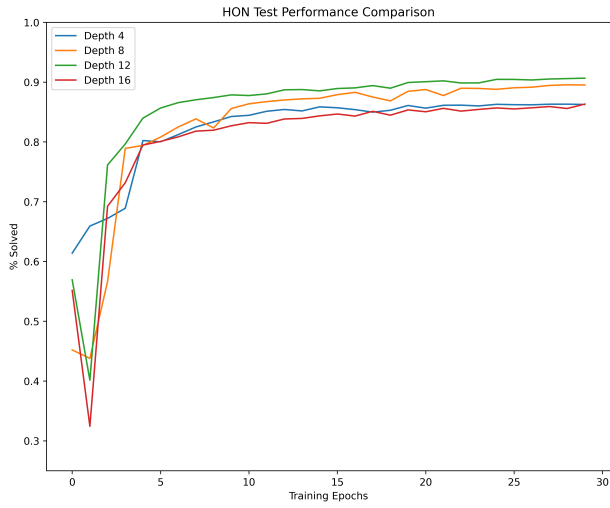

(a) HON test performance.

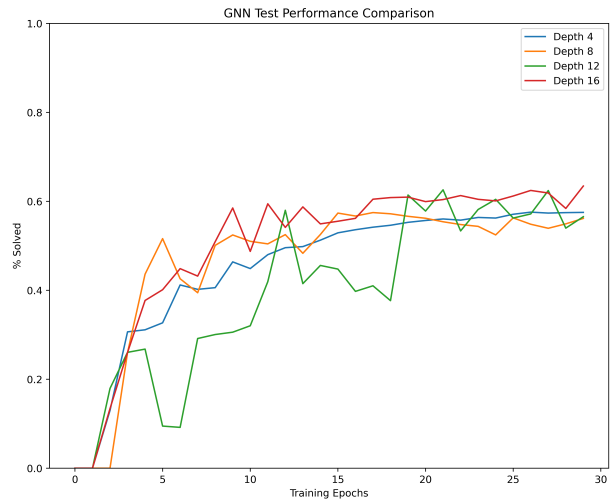

(b) GNN test performance.

Figure 5. Test performance curves show the average percentage of correct colorings on test set after each training epoch.
